# Supplementary material
Source: Springer Nature journal article supplement (https://www.springermedizin.de/resource/supplementary/12967_2007_183_MOESM1_ESM.pdf/9575876)

## Activity of CD39 in Normal and Malignant Cells

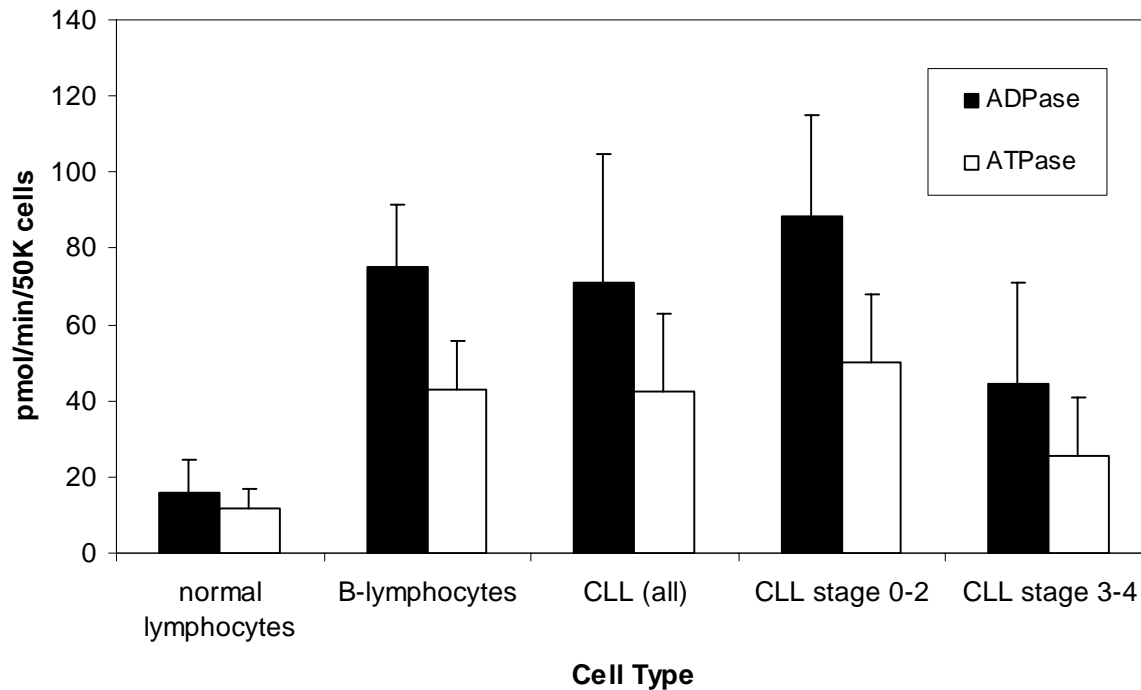

Supplement: MOESM1 [file 9575876]
